# Supplementary material
Source: Research Square preprint supplement (doi:10.21203/rs.3.rs-9338923/v1)
Supplement: Supplementary file 1 [file 96a911e69fa9a1bad04d49c4.docx]

**
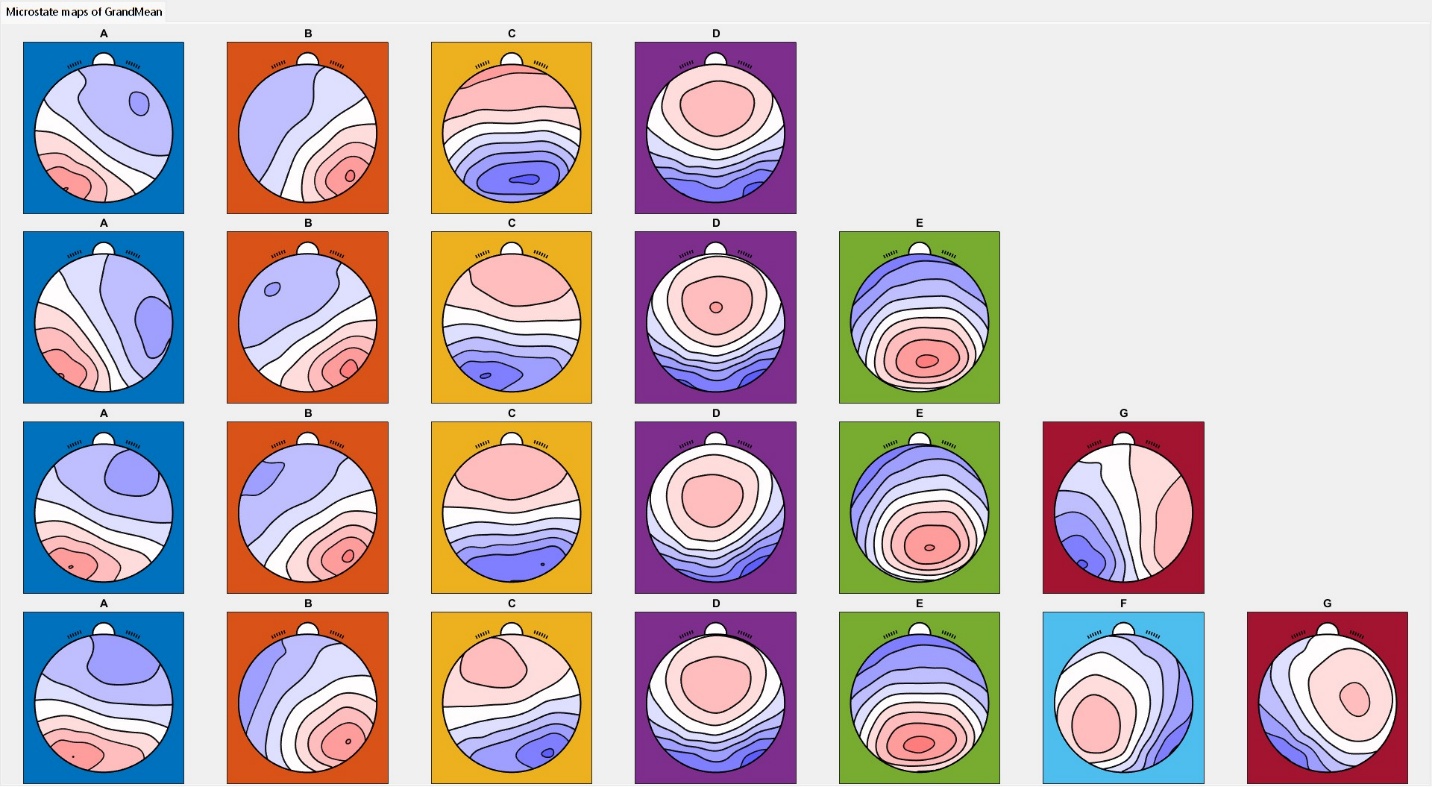
**

**Supplementary Figure 1. Grand mean maps in the second dataset.** Each set of maps was compared with the published metamaps for consistency among studies and datasets.

**Supplementary Table 1. Welch’s and Bayesian Student’s t test on EEG microstate parameters across datasets**

| **Dataset 1** | **Group** | **t** | **p** | **BF10** | **Cohen's d** | **Lower** | **Upper** |
| --- | --- | --- | --- | --- | --- | --- | --- |
| MeanDuration_A | CTL vs Subclinical | 3.555 | < .001 | 9.443 | 0.78 | 0.276 | 1.277 |
| MeanDuration_B | CTL vs Subclinical | 1.762 | 0.087 | 0.891 | 0.424 | -0.064 | 0.908 |
| MeanDuration_C | CTL vs Subclinical | 2.335 | 0.024 | 1.311 | 0.519 | 0.029 | 1.004 |
| MeanDuration_D | CTL vs Subclinical | 1.16 | 0.254 | 0.415 | 0.273 | -0.208 | 0.752 |
| MeanDuration_E | CTL vs Subclinical | 1.72 | 0.095 | 0.909 | 0.421 | -0.068 | 0.904 |
| MeanDuration_G | CTL vs Subclinical | 3.201 | 0.003 | 8.217 | 0.737 | 0.231 | 1.235 |
| MeanOccurrence_A | CTL vs Subclinical | -0.547 | 0.588 | 0.286 | -0.135 | -0.611 | 0.343 |
| MeanOccurrence_B | CTL vs Subclinical | -1.63 | 0.112 | 0.733 | -0.392 | -0.873 | 0.096 |
| MeanOccurrence_C | CTL vs Subclinical | -1.376 | 0.18 | 0.766 | -0.36 | -0.843 | 0.128 |
| MeanOccurrence_D | CTL vs Subclinical | -1.917 | 0.064 | 1.494 | -0.482 | -0.969 | 0.013 |
| MeanOccurrence_E | CTL vs Subclinical | -0.662 | 0.513 | 0.306 | -0.164 | -0.641 | 0.315 |
| MeanOccurrence_G | CTL vs Subclinical | -0.66 | 0.514 | 0.305 | -0.164 | -0.64 | 0.315 |
| Coverage_A | CTL vs Subclinical | 0.793 | 0.433 | 0.316 | 0.187 | -0.292 | 0.663 |
| Coverage_B | CTL vs Subclinical | -0.553 | 0.584 | 0.281 | -0.131 | -0.607 | 0.346 |
| Coverage_C | CTL vs Subclinical | 0.106 | 0.916 | 0.25 | 0.026 | -0.451 | 0.501 |
| Coverage_D | CTL vs Subclinical | -0.869 | 0.392 | 0.357 | -0.217 | -0.694 | 0.264 |
| Coverage_E | CTL vs Subclinical | 0.336 | 0.739 | 0.264 | 0.085 | -0.392 | 0.561 |
| Coverage_G | CTL vs Subclinical | 0.284 | 0.778 | 0.258 | 0.07 | -0.407 | 0.546 |
| MeanDuration_A | CTL vs MDD | 2.353 | 0.023 | 1.771 | 0.537 | 0.053 | 1.016 |
| MeanDuration_B | CTL vs MDD | 1.762 | 0.085 | 0.73 | 0.4 | -0.078 | 0.873 |
| MeanDuration_C | CTL vs MDD | 0.543 | 0.591 | 0.288 | 0.137 | -0.333 | 0.605 |
| MeanDuration_D | CTL vs MDD | 1.744 | 0.088 | 0.671 | 0.389 | -0.087 | 0.862 |
| MeanDuration_E | CTL vs MDD | 2.1 | 0.042 | 1.175 | 0.479 | -0.003 | 0.955 |
| MeanDuration_G | CTL vs MDD | 2.21 | 0.033 | 1.961 | 0.528 | 0.042 | 1.008 |
| MeanOccurrence_A | CTL vs MDD | -0.68 | 0.5 | 0.288 | -0.153 | -0.622 | 0.316 |
| MeanOccurrence_B | CTL vs MDD | -1.463 | 0.153 | 0.679 | -0.359 | -0.832 | 0.12 |
| MeanOccurrence_C | CTL vs MDD | -1.831 | 0.075 | 1.04 | -0.439 | -0.914 | 0.043 |
| MeanOccurrence_D | CTL vs MDD | -1.594 | 0.119 | 0.705 | -0.378 | -0.851 | 0.1 |
| MeanOccurrence_E | CTL vs MDD | -0.489 | 0.628 | 0.274 | -0.119 | -0.587 | 0.351 |
| MeanOccurrence_G | CTL vs MDD | -0.817 | 0.419 | 0.324 | -0.193 | -0.662 | 0.278 |
| Coverage_A | CTL vs MDD | 0.454 | 0.652 | 0.263 | 0.101 | -0.368 | 0.569 |
| Coverage_B | CTL vs MDD | -0.486 | 0.629 | 0.266 | -0.108 | -0.576 | 0.361 |
| Coverage_C | CTL vs MDD | -0.622 | 0.538 | 0.296 | -0.153 | -0.621 | 0.318 |
| Coverage_D | CTL vs MDD | -0.172 | 0.864 | 0.248 | -0.037 | -0.505 | 0.431 |
| Coverage_E | CTL vs MDD | 0.847 | 0.402 | 0.323 | 0.196 | -0.275 | 0.665 |
| Coverage_G | CTL vs MDD | 0.075 | 0.94 | 0.246 | 0.017 | -0.451 | 0.485 |
| Dataset 2 | Group | t | p | BF10 | Cohen's d | Lower | Upper |
| MeanDuration_A | CTL vs mild D | 0.332 | 0.741 | 0.295 | 0.093 | -0.462 | 0.647 |
| MeanDuration_B | CTL vs mild D | -0.344 | 0.733 | 0.295 | -0.095 | -0.649 | 0.46 |
| MeanDuration_C | CTL vs mild D | -1.655 | 0.105 | 0.718 | -0.447 | -1.007 | 0.118 |
| MeanDuration_D | CTL vs mild D | -0.883 | 0.382 | 0.369 | -0.238 | -0.794 | 0.319 |
| MeanDuration_E | CTL vs mild D | -0.912 | 0.366 | 0.379 | -0.248 | -0.804 | 0.309 |
| MeanDuration_G | CTL vs mild D | 1.215 | 0.23 | 0.49 | 0.336 | -0.224 | 0.892 |
| MeanOccurrence_A | CTL vs mild D | 1.059 | 0.295 | 0.419 | 0.288 | -0.271 | 0.844 |
| MeanOccurrence_B | CTL vs mild D | 0.942 | 0.351 | 0.4 | 0.263 | -0.295 | 0.818 |
| MeanOccurrence_C | CTL vs mild D | -0.719 | 0.475 | 0.346 | -0.201 | -0.756 | 0.356 |
| MeanOccurrence_D | CTL vs mild D | -0.056 | 0.955 | 0.283 | -0.016 | -0.57 | 0.538 |
| MeanOccurrence_E | CTL vs mild D | 0.075 | 0.941 | 0.283 | 0.021 | -0.534 | 0.575 |
| MeanOccurrence_G | CTL vs mild D | 1.79 | 0.08 | 0.931 | 0.496 | -0.07 | 1.056 |
| Coverage_A | CTL vs mild D | 1.17 | 0.248 | 0.472 | 0.324 | -0.236 | 0.88 |
| Coverage_B | CTL vs mild D | 0.581 | 0.564 | 0.322 | 0.162 | -0.394 | 0.716 |
| Coverage_C | CTL vs mild D | -1.545 | 0.129 | 0.669 | -0.424 | -0.982 | 0.139 |
| Coverage_D | CTL vs mild D | -0.268 | 0.79 | 0.291 | -0.075 | -0.629 | 0.479 |
| Coverage_E | CTL vs mild D | -0.334 | 0.74 | 0.294 | -0.092 | -0.646 | 0.463 |
| Coverage_G | CTL vs mild D | 2.266 | 0.028 | 1.987 | 0.632 | 0.061 | 1.197 |
| Dataset 3 | Group | t | p | BF10 | Cohen's d | Lower | Upper |
| MeanDuration_A | CTL vs Subclinical | 1.029 | 0.309 | 0.422 | 0.278 | -0.263 | 0.822 |
| MeanDuration_B | CTL vs Subclinical | 0.648 | 0.52 | 0.327 | 0.276 | -0.365 | 0.716 |
| MeanDuration_C | CTL vs Subclinical | -0.226 | 0.822 | 0.282 | 0.275 | -0.601 | 0.477 |
| MeanDuration_D | CTL vs Subclinical | 0.577 | 0.567 | 0.316 | 0.276 | -0.383 | 0.697 |
| MeanDuration_E | CTL vs Subclinical | 0.95 | 0.347 | 0.401 | 0.277 | -0.282 | 0.802 |
| MeanDuration_G | CTL vs Subclinical | 1.451 | 0.153 | 0.629 | 0.28 | -0.153 | 0.938 |
| MeanOccurrence_A | CTL vs Subclinical | -0.143 | 0.887 | 0.279 | 0.275 | -0.578 | 0.5 |
| MeanOccurrence_B | CTL vs Subclinical | -0.762 | 0.449 | 0.351 | 0.277 | -0.749 | 0.333 |
| MeanOccurrence_C | CTL vs Subclinical | -1.556 | 0.126 | 0.731 | 0.281 | -0.97 | 0.122 |
| MeanOccurrence_D | CTL vs Subclinical | -0.535 | 0.595 | 0.31 | 0.276 | -0.685 | 0.395 |
| MeanOccurrence_E | CTL vs Subclinical | 0.38 | 0.705 | 0.294 | 0.276 | -0.435 | 0.644 |
| MeanOccurrence_G | CTL vs Subclinical | 0.141 | 0.888 | 0.279 | 0.275 | -0.501 | 0.578 |
| Coverage_A | CTL vs Subclinical | 0.225 | 0.823 | 0.282 | 0.275 | -0.478 | 0.601 |
| Coverage_B | CTL vs Subclinical | -0.208 | 0.836 | 0.281 | 0.275 | -0.596 | 0.483 |
| Coverage_C | CTL vs Subclinical | -0.725 | 0.472 | 0.343 | 0.276 | -0.739 | 0.342 |
| Coverage_D | CTL vs Subclinical | -0.008 | 0.993 | 0.276 | 0.275 | -0.542 | 0.537 |
| Coverage_E | CTL vs Subclinical | 0.555 | 0.582 | 0.315 | 0.276 | -0.388 | 0.693 |
| Coverage_G | CTL vs Subclinical | 0.608 | 0.546 | 0.321 | 0.276 | -0.375 | 0.706 |

P values are not corrected for multiple testing.
